# Supplementary material for: EBV-associated epigenetic signature in a colorectal cancer multicase family.
Source: Research Square preprint supplement (doi:10.21203/rs.3.rs-3643167/v1), 2023-11-29
Supplement: Supplementary file 1 [file 1f08d0e1b7122ed927eacd53.docx]

**Supplementary table 2:** Total number of SNPs in APOBEC3A, APOBEC3B, and APOBEC3G in cases and controls

|  | **Cases** | | **Total** | **Control** | | **total** |
| --- | --- | --- | --- | --- | --- | --- |
|  | **Synonymous** | **Non-Synonymous** |  | **Synonymous** | **Non-Synonymous** |  |
| **A3A** | 0 | 0 | 0 | 0 | 1 | **1** |
| **A3B** | 0 | 4 | 4 | 0 | 2 | **2** |
| **A3G** | 3 | 0 | 3 | 4 | 3 | **7** |
|  | 3 | 4 | 7 | **4** | **6** | **10** |
