# Supplementary material for: EBV-associated epigenetic signature in a colorectal cancer multicase family.
Source: Research Square preprint supplement (doi:10.21203/rs.3.rs-3643167/v1), 2023-11-29
Supplement: Supplementary file 2 [file 589c65190b815f8a1cfe3c2f.docx]

|  | total SNP | Significant (Sift and Polyphen) tools | Cancer associated genes (NCG3) | CRC associated genes |
| --- | --- | --- | --- | --- |
| Patient 17 | 3845 | 362 | 62 | 14 |
| Patient 61 | 3575 | 323 | 45 | 10 |
| Control 39 | 1795 | 275 | 49 | 9 |
| Control 26 | 1759 | 266 | 49 | 11 |
| Control 84 | 1813 | 75 | 8 | 5 |

**Supplementary table 1: SNP analysis for each sample**
