# Supplementary material for: EBV-associated epigenetic signature in a colorectal cancer multicase family.
Source: Research Square preprint supplement (doi:10.21203/rs.3.rs-3643167/v1), 2023-11-29
Supplement: Supplementary file 3 [file bdb77dde3c376013051567a8.docx]

**Supplementary Table 3:** Moderate and high impact 3`UTR genes and related mi-RNA.

| Gene | Rs | Transcript | miRNA |
| --- | --- | --- | --- |
| ITGA6 | rs201055917 | NM_000210 | hsa-miR-130  hsa-miR-335-3p  hsa-miR-4761-5p  hsa-miR-498  hsa-miR-561-5p |
| DYX1C1 | rs57809907 | NM_001033559 | hsa-miR-148b-5p  hsa-miR-26b-3p  hsa-miR-3168  hsa-miR-4652-3p  hsa-miR-5584-3p  hsa-miR-6874-3p  hsa-miR-101-5p |
| NXF1 | rs4693 | NM_001081491 | hsa-miR-3655  hsa-miR-6780b-3p  hsa-miR-1915-5p |
| OAS2 | rs15895 | NM_002535 | hsa-miR-1251-5p  hsa-miR-3675-3p  hsa-miR-517-5p  hsa-miR-6508-5p  hsa-miR-8067  hsa-miR-3925-3p  hsa-miR-766-3p |
| NCF4 | rs1858 | NM_013416 | hsa-miR-4271  hsa-miR-4725-3p  hsa-miR-6780b-5p  hsa-miR-6783-5p  hsa-miR-3153  hsa-miR-5584-5p  hsa-miR-6733-5p  hsa-miR-6739-5p  hsa-miR-7113-5p |
| AGXT2 | rs16899972 | NM_031900 | hsa-miR-4803 |
| BCL2L11 | rs724710 | NM_138625 | hsa-miR-323b-3p  hsa-miR-515-5p  hsa-miR-519d-5p  hsa-miR-519e-5p  hsa-miR-5695 |
