# Supplementary material for: EBV-associated epigenetic signature in a colorectal cancer multicase family.
Source: Research Square preprint supplement (doi:10.21203/rs.3.rs-3643167/v1), 2023-11-29
Supplement: Supplementary file 4 [file c1b9e32d9ec82f4f4140739c.docx]

**Supplementary Table 4:** 3`UTR dysfunction actionable colorectal cancer genes and associated mi-RNA.

| **miRNA** | **Transcript** | **Rs** | **Gene** |
| --- | --- | --- | --- |
| [hsa-let-7a-3p](http://www.mirbase.org/textsearch.shtml?q=hsa-let-7a-3p) [hsa-let-7b-3p](http://www.mirbase.org/textsearch.shtml?q=hsa-let-7b-3p) [hsa-let-7f-1-3p](http://www.mirbase.org/textsearch.shtml?q=hsa-let-7f-1-3p) [hsa-let-7f-2-3p](http://www.mirbase.org/textsearch.shtml?q=hsa-let-7f-2-3p) [hsa-miR-1185-1-3p](http://www.mirbase.org/textsearch.shtml?q=hsa-miR-1185-1-3p) [hsa-miR-1185-2-3p](http://www.mirbase.org/textsearch.shtml?q=hsa-miR-1185-2-3p) [hsa-miR-300](http://www.mirbase.org/textsearch.shtml?q=hsa-miR-300) [hsa-miR-381-3p](http://www.mirbase.org/textsearch.shtml?q=hsa-miR-381-3p) [hsa-miR-4666a-3p](http://www.mirbase.org/textsearch.shtml?q=hsa-miR-4666a-3p) [hsa-miR-4789-5p](http://www.mirbase.org/textsearch.shtml?q=hsa-miR-4789-5p) [hsa-miR-98-3p](http://www.mirbase.org/textsearch.shtml?q=hsa-miR-98-3p) [hsa-miR-190a-3p](http://www.mirbase.org/textsearch.shtml?q=hsa-miR-190a-3p) [hsa-miR-410-3p](http://www.mirbase.org/textsearch.shtml?q=hsa-miR-410-3p) | [NM_000551](http://www.ncbi.nlm.nih.gov/nuccore/NM_000551) | rs1642742 | VHL |
| [hsa-miR-154-5p](http://www.mirbase.org/textsearch.shtml?q=hsa-miR-154-5p) | [NM_000369](http://www.ncbi.nlm.nih.gov/nuccore/NM_000369) | rs2268477 | TSHR |
| [hsa-miR-331-3p](http://www.mirbase.org/textsearch.shtml?q=hsa-miR-331-3p) [hsa-miR-3679-3p](http://www.mirbase.org/textsearch.shtml?q=hsa-miR-3679-3p) [hsa-miR-4297](http://www.mirbase.org/textsearch.shtml?q=hsa-miR-4297) [hsa-miR-5581-5p](http://www.mirbase.org/textsearch.shtml?q=hsa-miR-5581-5p) [hsa-miR-6734-3p](http://www.mirbase.org/textsearch.shtml?q=hsa-miR-6734-3p) [hsa-miR-4287](http://www.mirbase.org/textsearch.shtml?q=hsa-miR-4287) [hsa-miR-4292](http://www.mirbase.org/textsearch.shtml?q=hsa-miR-4292) [hsa-miR-4308](http://www.mirbase.org/textsearch.shtml?q=hsa-miR-4308) [hsa-miR-4469](http://www.mirbase.org/textsearch.shtml?q=hsa-miR-4469) [hsa-miR-4685-3p](http://www.mirbase.org/textsearch.shtml?q=hsa-miR-4685-3p) [hsa-miR-4713-5p](http://www.mirbase.org/textsearch.shtml?q=hsa-miR-4713-5p) [hsa-miR-629-3p](http://www.mirbase.org/textsearch.shtml?q=hsa-miR-629-3p) [hsa-miR-6791-5p](http://www.mirbase.org/textsearch.shtml?q=hsa-miR-6791-5p) [hsa-miR-6867-3p](http://www.mirbase.org/textsearch.shtml?q=hsa-miR-6867-3p) [hsa-miR-7113-3p](http://www.mirbase.org/textsearch.shtml?q=hsa-miR-7113-3p) | [NM_173175](http://www.ncbi.nlm.nih.gov/nuccore/NM_173175) | rs2271920 | PTK2B |
| [hsa-miR-3155a](http://www.mirbase.org/textsearch.shtml?q=hsa-miR-3155a) [hsa-miR-3155b](http://www.mirbase.org/textsearch.shtml?q=hsa-miR-3155b) [hsa-miR-484](http://www.mirbase.org/textsearch.shtml?q=hsa-miR-484) [hsa-miR-3944-3p](http://www.mirbase.org/textsearch.shtml?q=hsa-miR-3944-3p) | [NM_001033082](http://www.ncbi.nlm.nih.gov/nuccore/NM_001033082) | rs112053791 | MYCL1 |
| [hsa-miR-1286](http://www.mirbase.org/textsearch.shtml?q=hsa-miR-1286) [hsa-miR-214-3p](http://www.mirbase.org/textsearch.shtml?q=hsa-miR-214-3p) [hsa-miR-3619-5p](http://www.mirbase.org/textsearch.shtml?q=hsa-miR-3619-5p) [hsa-miR-4530](http://www.mirbase.org/textsearch.shtml?q=hsa-miR-4530) [hsa-miR-6165](http://www.mirbase.org/textsearch.shtml?q=hsa-miR-6165) [hsa-miR-634](http://www.mirbase.org/textsearch.shtml?q=hsa-miR-634) [hsa-miR-761](http://www.mirbase.org/textsearch.shtml?q=hsa-miR-761) | [NM_030662](http://www.ncbi.nlm.nih.gov/nuccore/NM_030662) | rs6629 | MAP2K2 |
| [hsa-miR-4433-3p](http://www.mirbase.org/textsearch.shtml?q=hsa-miR-4433-3p) [hsa-miR-665](http://www.mirbase.org/textsearch.shtml?q=hsa-miR-665) [hsa-miR-4497](http://www.mirbase.org/textsearch.shtml?q=hsa-miR-4497) | [NM_002253](http://www.ncbi.nlm.nih.gov/nuccore/NM_002253) | rs4421048 | KDR |
| [hsa-miR-513b-3p](http://www.mirbase.org/textsearch.shtml?q=hsa-miR-513b-3p) [hsa-miR-3677-3p](http://www.mirbase.org/textsearch.shtml?q=hsa-miR-3677-3p) [hsa-miR-4440](http://www.mirbase.org/textsearch.shtml?q=hsa-miR-4440) [hsa-miR-4447](http://www.mirbase.org/textsearch.shtml?q=hsa-miR-4447) [hsa-miR-4472](http://www.mirbase.org/textsearch.shtml?q=hsa-miR-4472) | [NM_000215](http://www.ncbi.nlm.nih.gov/nuccore/NM_000215) | rs3008 | JAK3 |
| [hsa-miR-4286](http://www.mirbase.org/textsearch.shtml?q=hsa-miR-4286) | [NM_000875](http://www.ncbi.nlm.nih.gov/nuccore/NM_000875) | rs199998842 | IGF1R |
| [hsa-miR-1197](http://www.mirbase.org/textsearch.shtml?q=hsa-miR-1197) [hsa-miR-4462](http://www.mirbase.org/textsearch.shtml?q=hsa-miR-4462) [hsa-miR-885-3p](http://www.mirbase.org/textsearch.shtml?q=hsa-miR-885-3p) [hsa-miR-942-3p](http://www.mirbase.org/textsearch.shtml?q=hsa-miR-942-3p) | [NM_016592](http://www.ncbi.nlm.nih.gov/nuccore/NM_016592) | rs121913495 | GNAS |
| [hsa-miR-1265](http://www.mirbase.org/textsearch.shtml?q=hsa-miR-1265) [hsa-miR-3664-3p](http://www.mirbase.org/textsearch.shtml?q=hsa-miR-3664-3p) [hsa-miR-510-5p](http://www.mirbase.org/textsearch.shtml?q=hsa-miR-510-5p) | [NM_016592](http://www.ncbi.nlm.nih.gov/nuccore/NM_016592) | rs7121 | GNAS |
| [hsa-miR-1234-3p](http://www.mirbase.org/textsearch.shtml?q=hsa-miR-1234-3p) [hsa-miR-6795-3p](http://www.mirbase.org/textsearch.shtml?q=hsa-miR-6795-3p) [hsa-miR-7107-5p](http://www.mirbase.org/textsearch.shtml?q=hsa-miR-7107-5p) [hsa-miR-4293](http://www.mirbase.org/textsearch.shtml?q=hsa-miR-4293) | [NM_001159920](http://www.ncbi.nlm.nih.gov/nuccore/NM_001159920) | rs2296284 | FLT1 |
| [hsa-miR-2115-5p](http://www.mirbase.org/textsearch.shtml?q=hsa-miR-2115-5p) [hsa-miR-4267](http://www.mirbase.org/textsearch.shtml?q=hsa-miR-4267) [hsa-miR-6512-3p](http://www.mirbase.org/textsearch.shtml?q=hsa-miR-6512-3p) [hsa-miR-6720-5p](http://www.mirbase.org/textsearch.shtml?q=hsa-miR-6720-5p) | [NM_002011](http://www.ncbi.nlm.nih.gov/nuccore/NM_002011) | rs1076890 | FGFR4 |
| [hsa-miR-548av-5p](http://www.mirbase.org/textsearch.shtml?q=hsa-miR-548av-5p) [hsa-miR-548k](http://www.mirbase.org/textsearch.shtml?q=hsa-miR-548k) [hsa-miR-8054](http://www.mirbase.org/textsearch.shtml?q=hsa-miR-8054) [hsa-miR-200a-5p](http://www.mirbase.org/textsearch.shtml?q=hsa-miR-200a-5p) [hsa-miR-200b-5p](http://www.mirbase.org/textsearch.shtml?q=hsa-miR-200b-5p) [hsa-miR-548l](http://www.mirbase.org/textsearch.shtml?q=hsa-miR-548l) [hsa-miR-550b-3p](http://www.mirbase.org/textsearch.shtml?q=hsa-miR-550b-3p) | [NM_001042599](http://www.ncbi.nlm.nih.gov/nuccore/NM_001042599) | rs1595066 | ERBB4 |
| [hsa-miR-4259](http://www.mirbase.org/textsearch.shtml?q=hsa-miR-4259) [hsa-miR-6740-5p](http://www.mirbase.org/textsearch.shtml?q=hsa-miR-6740-5p) | [NM_173655](http://www.ncbi.nlm.nih.gov/nuccore/NM_173655) | rs3214668 | EPHA6 |
| [hsa-miR-149-3p](http://www.mirbase.org/textsearch.shtml?q=hsa-miR-149-3p) [hsa-miR-4728-5p](http://www.mirbase.org/textsearch.shtml?q=hsa-miR-4728-5p) [hsa-miR-6785-5p](http://www.mirbase.org/textsearch.shtml?q=hsa-miR-6785-5p) [hsa-miR-6825-5p](http://www.mirbase.org/textsearch.shtml?q=hsa-miR-6825-5p) [hsa-miR-6883-5p](http://www.mirbase.org/textsearch.shtml?q=hsa-miR-6883-5p) [hsa-miR-1908-5p](http://www.mirbase.org/textsearch.shtml?q=hsa-miR-1908-5p) [hsa-miR-6087](http://www.mirbase.org/textsearch.shtml?q=hsa-miR-6087) [hsa-miR-663a](http://www.mirbase.org/textsearch.shtml?q=hsa-miR-663a) [hsa-miR-6787-5p](http://www.mirbase.org/textsearch.shtml?q=hsa-miR-6787-5p) | [NM_005211](http://www.ncbi.nlm.nih.gov/nuccore/NM_005211) | rs3216780 | CSF1R |
| [hsa-miR-1205](http://www.mirbase.org/textsearch.shtml?q=hsa-miR-1205) [hsa-miR-1288-3p](http://www.mirbase.org/textsearch.shtml?q=hsa-miR-1288-3p) [hsa-miR-3169](http://www.mirbase.org/textsearch.shtml?q=hsa-miR-3169) [hsa-miR-4418](http://www.mirbase.org/textsearch.shtml?q=hsa-miR-4418) [hsa-miR-509-3-5p](http://www.mirbase.org/textsearch.shtml?q=hsa-miR-509-3-5p) [hsa-miR-509-5p](http://www.mirbase.org/textsearch.shtml?q=hsa-miR-509-5p) [hsa-miR-6511b-5p](http://www.mirbase.org/textsearch.shtml?q=hsa-miR-6511b-5p) [hsa-miR-6811-5p](http://www.mirbase.org/textsearch.shtml?q=hsa-miR-6811-5p) [hsa-miR-4759](http://www.mirbase.org/textsearch.shtml?q=hsa-miR-4759) [hsa-miR-5095](http://www.mirbase.org/textsearch.shtml?q=hsa-miR-5095) [hsa-miR-7151-3p](http://www.mirbase.org/textsearch.shtml?q=hsa-miR-7151-3p) | [NM_000389](http://www.ncbi.nlm.nih.gov/nuccore/NM_000389) | rs1059234 | CDKN1A |
| [hsa-miR-6886-5p](http://www.mirbase.org/textsearch.shtml?q=hsa-miR-6886-5p)  [hsa-miR-1184](http://www.mirbase.org/textsearch.shtml?q=hsa-miR-1184) [hsa-miR-1205](http://www.mirbase.org/textsearch.shtml?q=hsa-miR-1205) [hsa-miR-1286](http://www.mirbase.org/textsearch.shtml?q=hsa-miR-1286) [hsa-miR-17-3p](http://www.mirbase.org/textsearch.shtml?q=hsa-miR-17-3p) [hsa-miR-2117](http://www.mirbase.org/textsearch.shtml?q=hsa-miR-2117) [hsa-miR-3158-5p](http://www.mirbase.org/textsearch.shtml?q=hsa-miR-3158-5p) [hsa-miR-3191-5p](http://www.mirbase.org/textsearch.shtml?q=hsa-miR-3191-5p) [hsa-miR-4722-5p](http://www.mirbase.org/textsearch.shtml?q=hsa-miR-4722-5p) [hsa-miR-6728-3p](http://www.mirbase.org/textsearch.shtml?q=hsa-miR-6728-3p) | [NM_001145306](http://www.ncbi.nlm.nih.gov/nuccore/NM_001145306) | rs42039 | CDK6 |
| [hsa-miR-1343-5p](http://www.mirbase.org/textsearch.shtml?q=hsa-miR-1343-5p) [hsa-miR-6798-5p](http://www.mirbase.org/textsearch.shtml?q=hsa-miR-6798-5p) [hsa-miR-939-5p](http://www.mirbase.org/textsearch.shtml?q=hsa-miR-939-5p) [hsa-miR-194-3p](http://www.mirbase.org/textsearch.shtml?q=hsa-miR-194-3p) [hsa-miR-223-3p](http://www.mirbase.org/textsearch.shtml?q=hsa-miR-223-3p) [hsa-miR-4697-3p](http://www.mirbase.org/textsearch.shtml?q=hsa-miR-4697-3p) [hsa-miR-5693](http://www.mirbase.org/textsearch.shtml?q=hsa-miR-5693) [hsa-miR-6081](http://www.mirbase.org/textsearch.shtml?q=hsa-miR-6081) | [NM_053056](http://www.ncbi.nlm.nih.gov/nuccore/NM_053056) | rs7177 | CCND1 |
